# Supplementary material for: Electrospun poly(l-lactide) nanofibers loaded with paclitaxel and water-soluble fullerenes for drug delivery and bioimaging
Source: Royal Society of Chemistry journal article supplement (doi:10.1039/c4nj01259c), 2014-01-01
Supplement: c4nj01259c1.pdf [file c4nj01259c1.pdf]

Electronic Supplementary Material (ESI) for New Journal of Chemistry

Supplementary material

Electrospun Poly(L-lactide) Nanofibers Loaded with Paclitaxel and Water-soluble Fullerenes for Drug Delivery and Bioimaging

Wanyun Liu, Junchao Wei, Yiwang Chen\*

College of Chemistry/Institute of Polymers, Nanchang University, 999 Xuefu Avenue,  
Nanchang 330031, China

\*Corresponding author. Tel.: +86 791 83969562; fax: +86 791 83969561.

E-mail address: ywchen@ncu.edu.cn (Y. Chen).

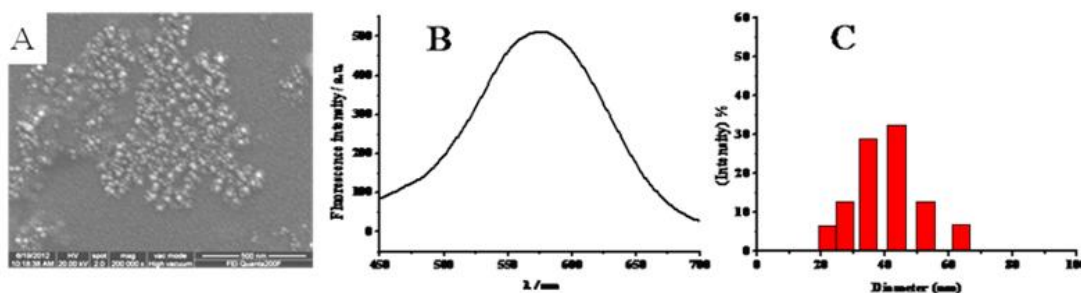

Fig. S1 The morphology, photoluminescence spectrum and size distribution of fullerene nanoparticles C<sub>70</sub>-TEGs. (A) SEM image, (B) fluorescence emission spectrum and (C) size distribution.

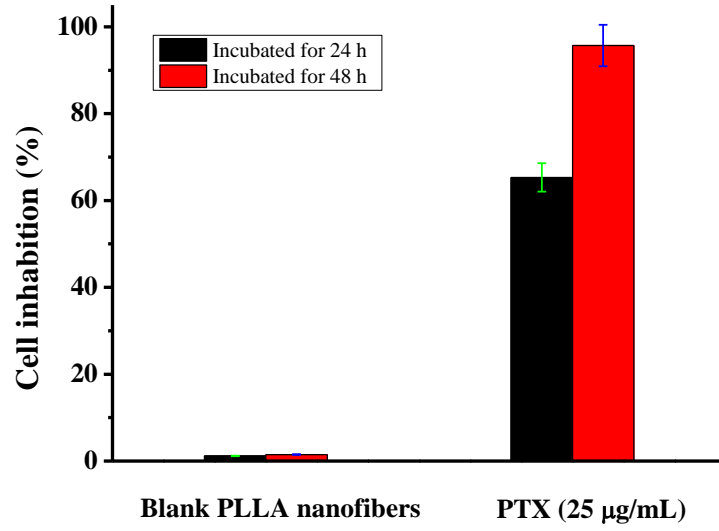

Fig. S2 Cytotoxicities of PTX and blank PLLA nanofibers to human liver carcinoma HepG-2 cells.

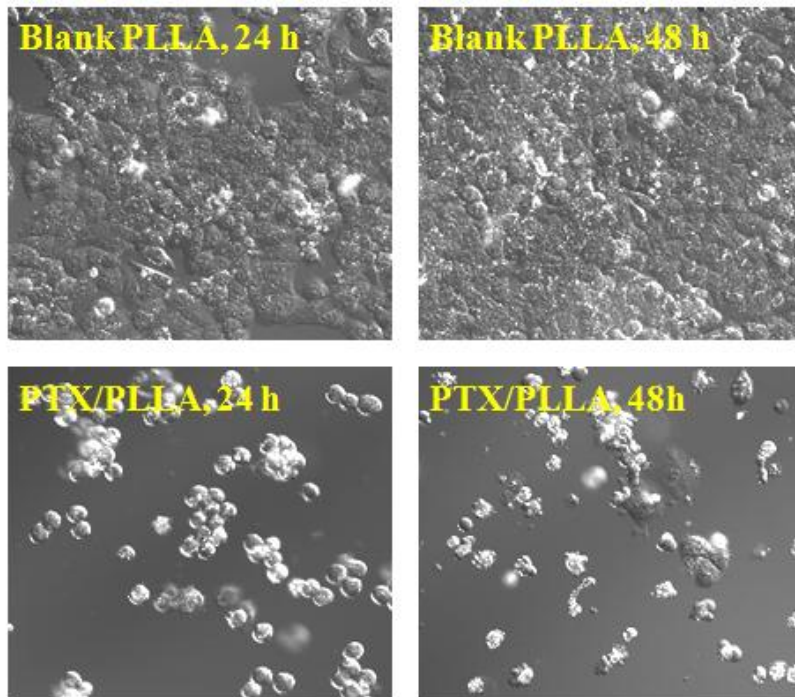

**Fig. S3** LSCM images of HepG-2 cells co-cultured with electrospun nanofibers PLLA and PTX/PLLA at different time (bright field).
